# Supplementary material for: Similar patterns of genetic diversity and linkage disequilibrium in Western chimpanzees (Pan troglodytes verus) and humans indicate highly conserved mechanisms of MHC molecular evolution
Source: PubMed Central journal article supplement (PMC7491122; doi:10.1186/s12862-020-01669-6), 2020-09-15
Supplement: 12862_2020_1669_MOESM19_ESM.pdf [file 12862_2020_1669_MOESM19_ESM.pdf]

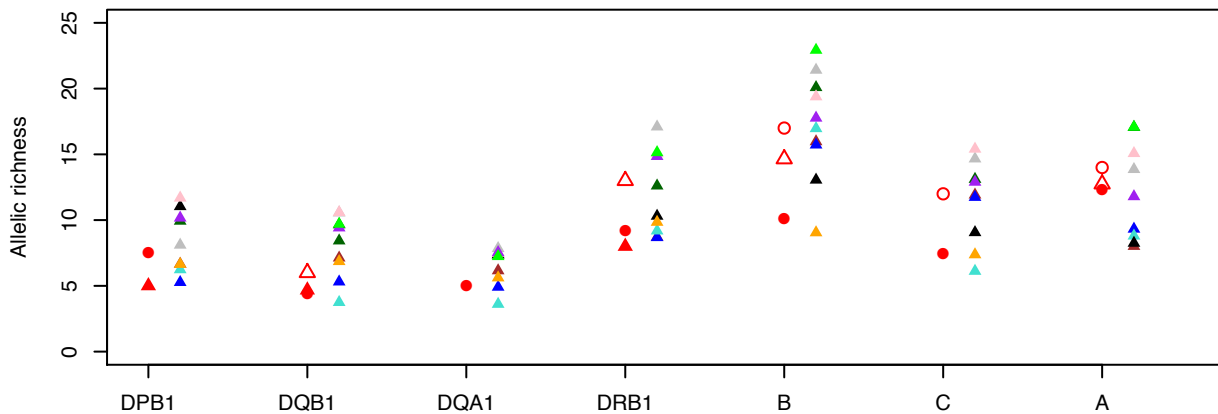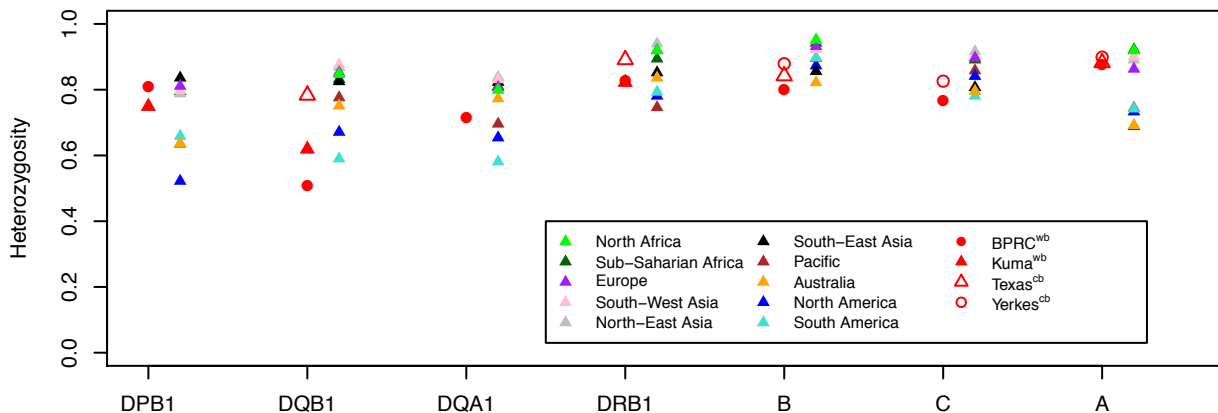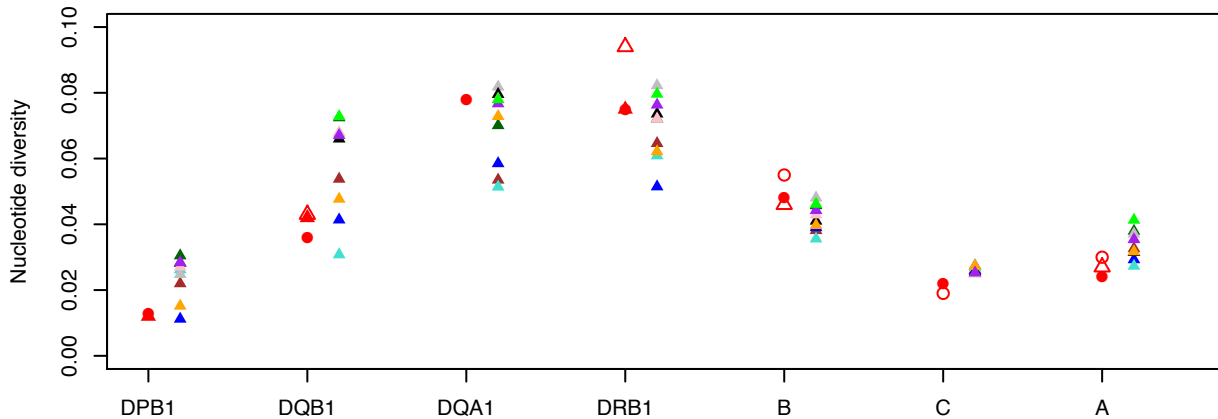

**Additional Figure S3:** Genetic diversity in chimpanzees (multiple cohorts) and humans (multiple populations) averaged by geographic regions. A) Allelic richness B) heterozygosity, C) nucleotide diversity at each locus under study for each cohort of chimpanzees and for the human populations where samples are grouped by geographic regions; The values calculated for each chimpanzee cohort are indicated by filled and unfilled shapes in red for cohorts of wild-born and captive-born chimpanzees, respectively; for the human populations, each region is represented by a triangle of different colour as defined in legend. The MHC loci are presented according to their position on the chromosome from the centromere (left) to the telomere (right).
