# Supplementary material for: Similar patterns of genetic diversity and linkage disequilibrium in Western chimpanzees (Pan troglodytes verus) and humans indicate highly conserved mechanisms of MHC molecular evolution
Source: PubMed Central journal article supplement (PMC7491122; doi:10.1186/s12862-020-01669-6), 2020-09-15
Supplement: 12862_2020_1669_MOESM20_ESM.pdf [file 12862_2020_1669_MOESM20_ESM.pdf]

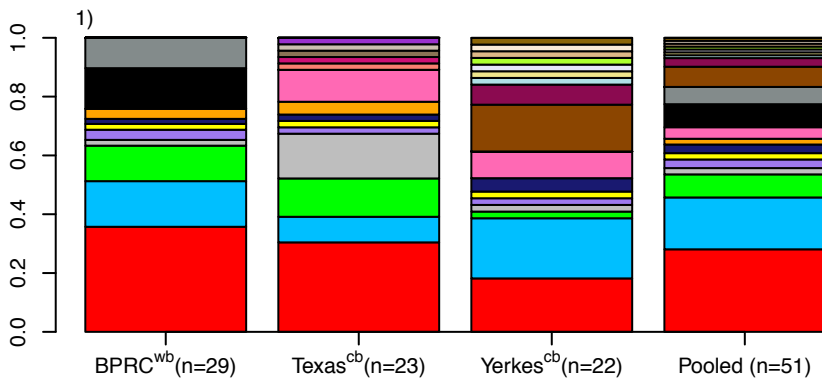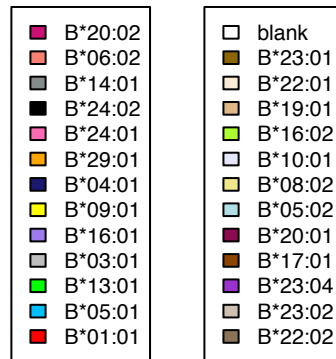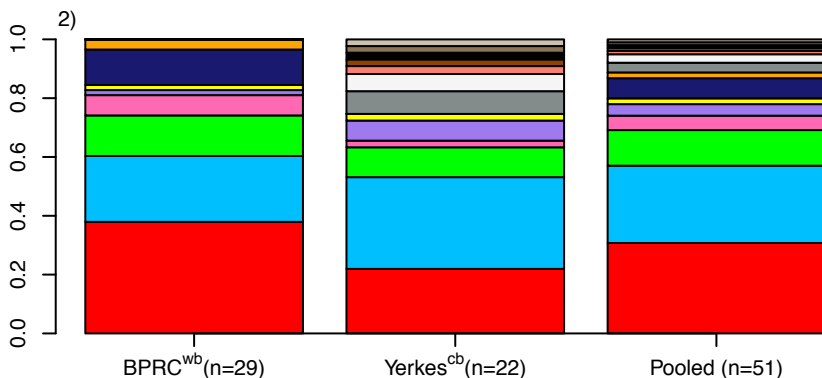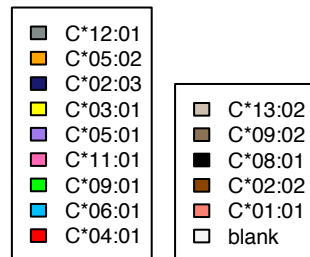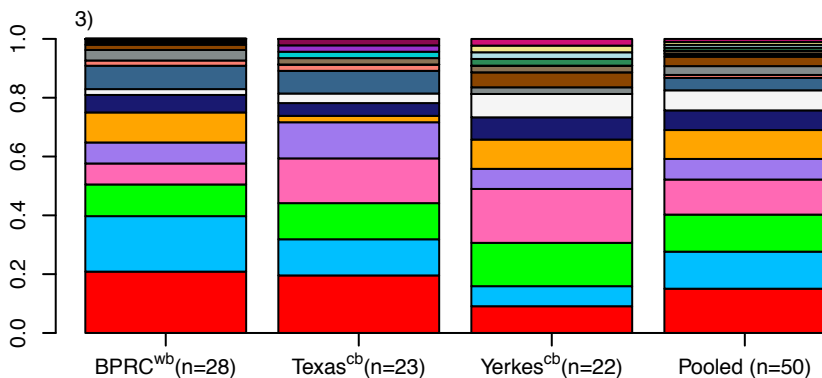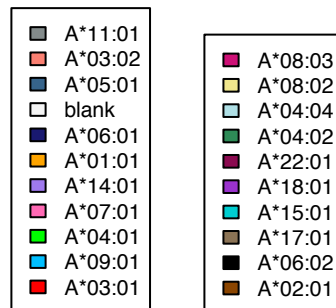

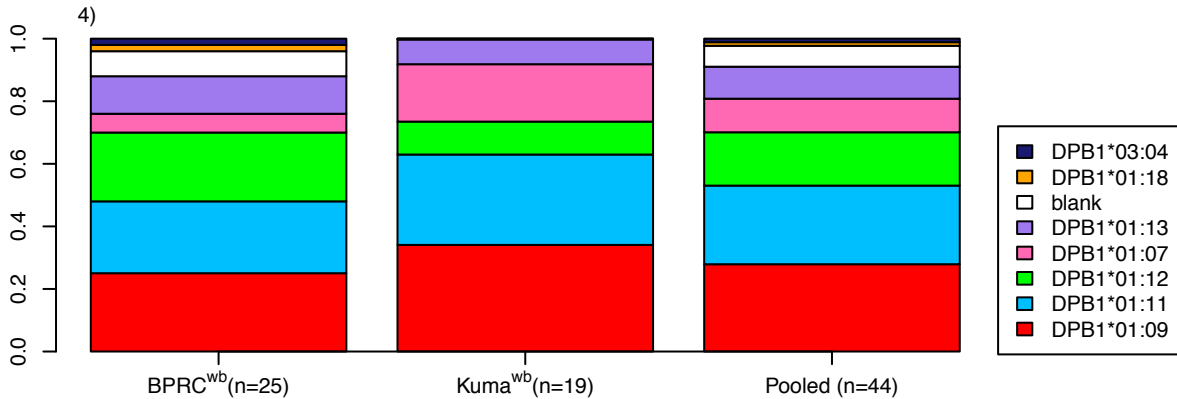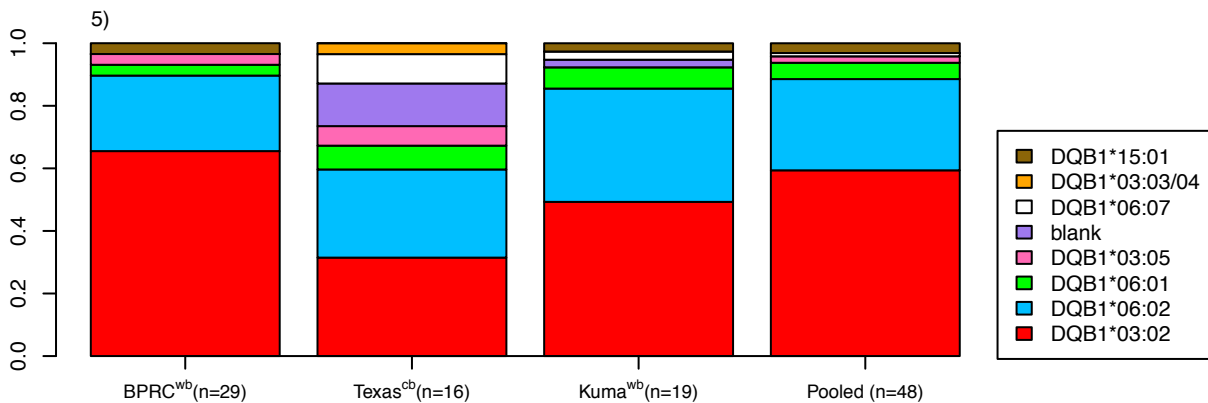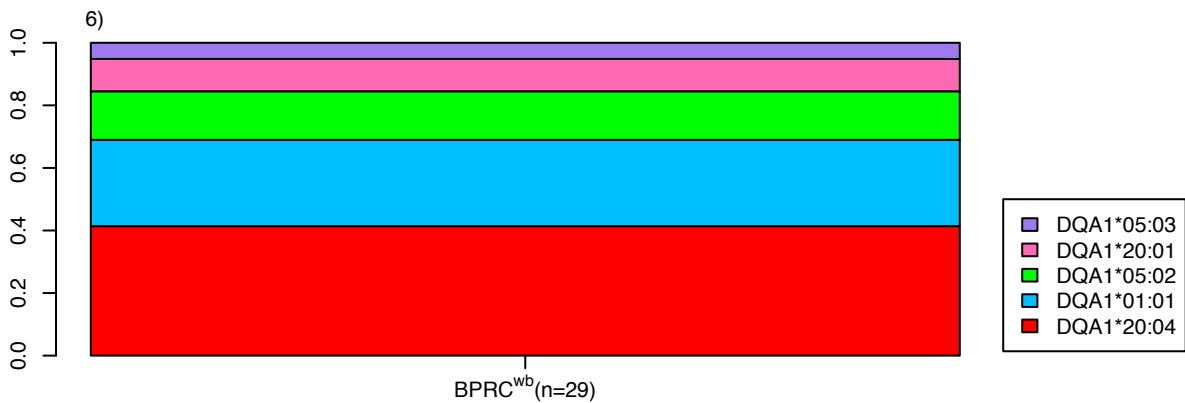



**Additional Figure S4:** Allele frequency distributions for class I and class II loci in the cohorts of chimpanzees including the pooled cohort. 1: locus B, 2: locus C, 3: locus A, 4: locus DPB1, 5: locus DQB1, 6: locus DQA1, and 7: locus DRB1. Alleles are represented by different colours as defined in the legend. Colours in the legend follow the same order as allele frequencies in the plot. Values are in Additional Table S3.
